# Supplementary material for: Tetrakis-(N-methyl-4-pyridinium)-porphyrin as a diamagnetic chemical exchange saturation transfer (diaCEST) MRI contrast agent
Source: Royal Society of Chemistry journal article supplement (doi:10.1039/d0nj04869k), 2020-12-09
Supplement: d0nj04869k1.pdf [file d0nj04869k1.pdf]

## Electronic Supplementary Information

# Tetrakis-(N-methyl-4-pyridinium)-Porphyrin as a Diamagnetic Chemical Exchange Saturation Transfer (diaCEST) MRI Contrast Agent

Subhayan Chakraborty<sup>[a]</sup>, Mainak Das<sup>[a]</sup>, A. Srinivasan<sup>\*[a]</sup> and Arindam Ghosh<sup>\*[a]</sup>

---

[a] School of Chemical Sciences, National Institute of Science Education and Research (HBNi), At/PO Jatni, Khurda 752050

\*Corresponding authors: [srini@niser.ac.in](mailto:srini@niser.ac.in) (AS), [aringh@niser.ac.in](mailto:aringh@niser.ac.in) (AG)

## Table of contents

- Figure S1: UV absorption spectrum of **TmPyP** in DMSO.
- Figure S2: <sup>13</sup>C NMR spectrum of **TmPyP** in DMSO-d<sub>6</sub>.
- Figure S3-S4: D<sub>2</sub>O titration of **TmPyP** in DMSO-d<sub>6</sub>.
- Figure S5: (a) Overlaid z-spectra for 6.6 pH with changing saturation power (b) Omega plot for calculation of  $k_{ex}$ .
- Figure S6: (a) Overlaid z-spectra for 7.0 pH with changing saturation power (b) Omega plot for calculation of  $k_{ex}$ .
- Figure S7: (a) Overlaid z-spectra for 7.2 pH with changing saturation power (b) Omega plot for calculation of  $k_{ex}$ .
- Figure S8: (a) Overlaid z-spectra for 7.6 pH with changing saturation power (b) Omega plot for calculation of  $k_{ex}$ .
- Figure S9: (a) Overlaid z-spectra for 7.8 pH with changing saturation power (b) Omega plot for calculation of  $k_{ex}$ .
- Figure S10: (a) Overlaid z-spectra for 8.0 pH with changing saturation power (b) Omega plot for calculation of  $k_{ex}$ .
- Figure S11: (a) Overlaid z-spectra for 8.3 pH with changing saturation power (b) Omega plot for calculation of  $k_{ex}$ .
- Figure S12: Overlaid z-spectra for (a) pH 6.6 to 7.4 and (b) pH 7.6 to pH 8.3
- Figure S13: (a) Overlaid z-spectra for **TmPyP** in FBS with changing saturation power (b) Omega plot for calculation of  $k_{ex}$ .
- Figure S14: Change in CEST percentage with changing concentration

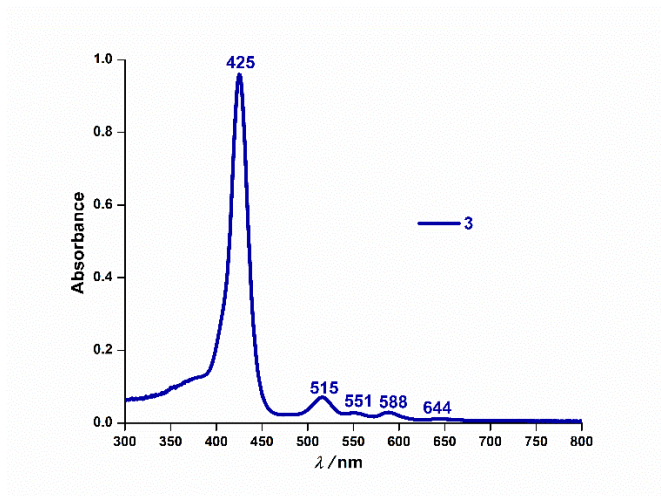

**Figure S1:** UV absorption spectrum of **TmPyP** (please refer to compound **2** in Chart 1 in the manuscript for the structure) in DMSO. The characteristic sharp soret band appears at 425 nm along with four weak Q bands at 515nm, 551nm, 588nm and 644nm.

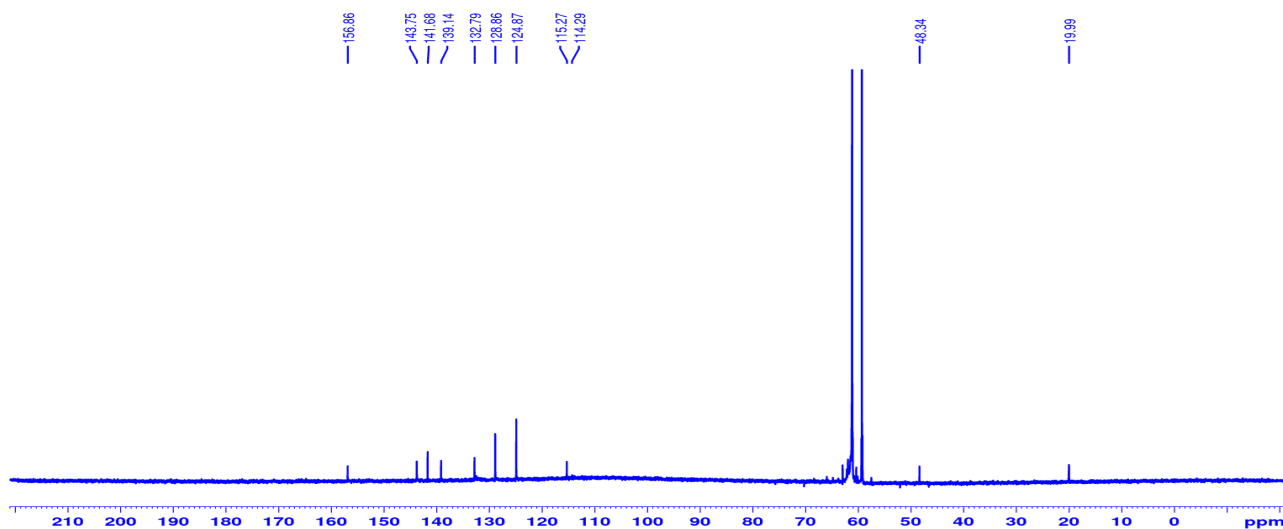

**Figure S2:**  $^{13}\text{C}$ -NMR spectrum of **TmPyP** in  $\text{DMSO-d}_6$  recorded on 700 MHz.  $\delta$  19.99, 48.34, 114.29, 115.27, 124.87, 128.86, 132.79, 139.14, 141.68, 143.75 and 156.86.

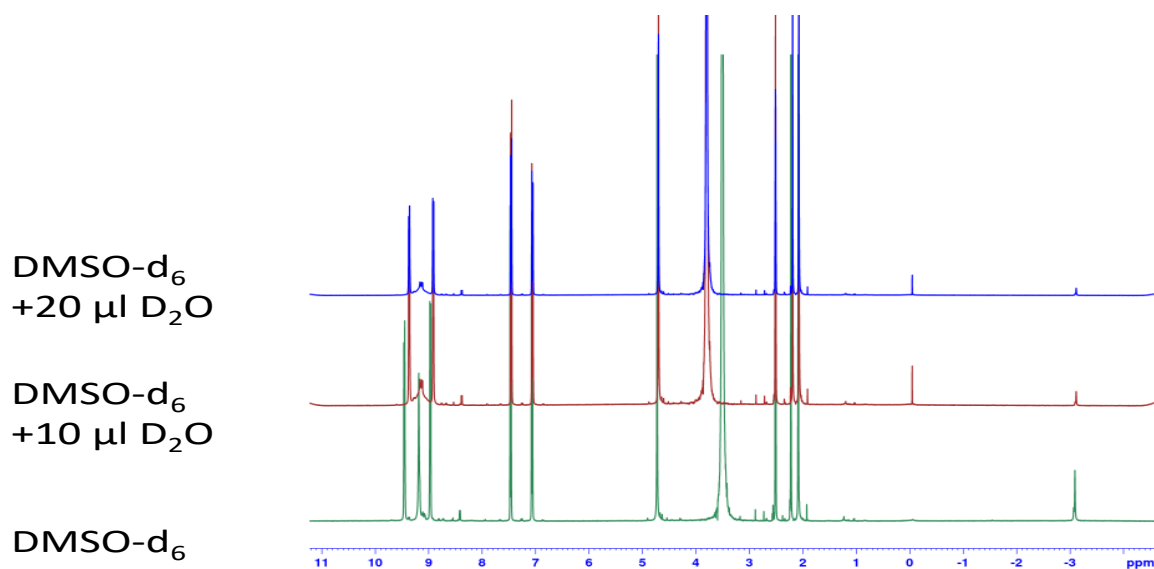

**Figure S3:**  $^1\text{H}$  NMR of **TmPyP** in  $\text{DMSO-d}_6$ . The inner core amine NH proton resonates at  $-3$  ppm. Upon addition of  $10\mu\text{l}$  of  $\text{D}_2\text{O}$  the intensity of this proton reduces and almost vanishes after the addition of another  $10\mu\text{l}$  of  $\text{D}_2\text{O}$ . This shows the exchangeable behavior of this inner core NH protons that are highly upfield shifted.

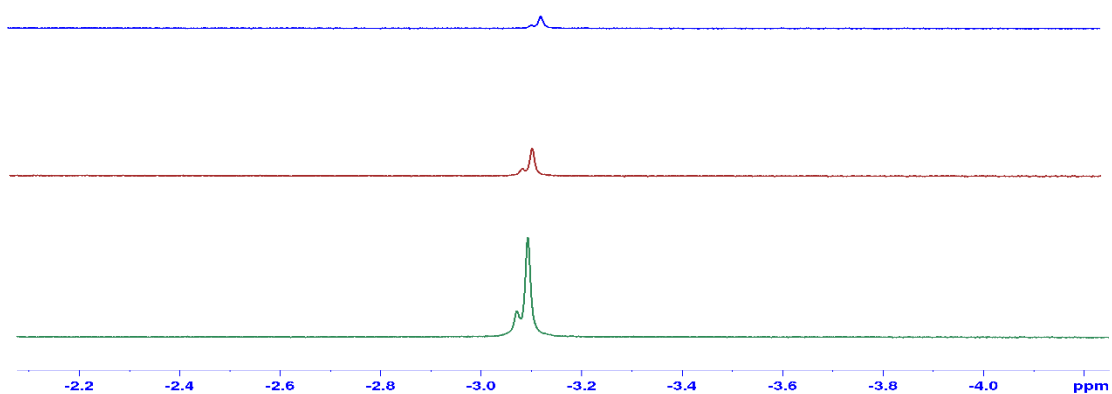

**Figure S4:** Expanded region around  $-3$  ppm of the spectra shown in Figure S5 indicating the decrease in intensity of the exchangeable proton upon addition of  $10\mu\text{l}$  and  $20\mu\text{l}$  of  $\text{D}_2\text{O}$ .

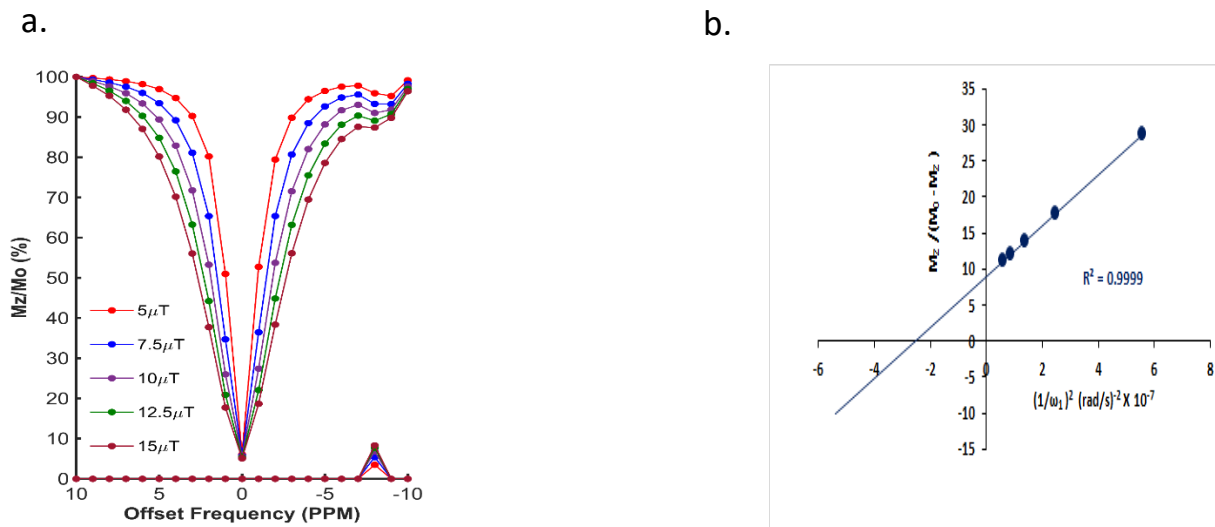

**Figure S5 :** (a) Dependence of CEST percentage on saturation field strength ranging from 5 $\mu$ T to 15 $\mu$ T for pH 6.6 (b) Omega plot for exchange rate measurement. The expected linear relationship of  $M_z/(M_0-M_z)$  as a function of  $1/\omega_1^2$  (rad/sec)<sup>-2</sup> x 10<sup>-7</sup> recorded at 9.4 T of 12.5 mM compound in 0.1M Tris-HCl buffer at pH 6.6. RF saturation pulse was applied for 6 s ensuring complete saturation.

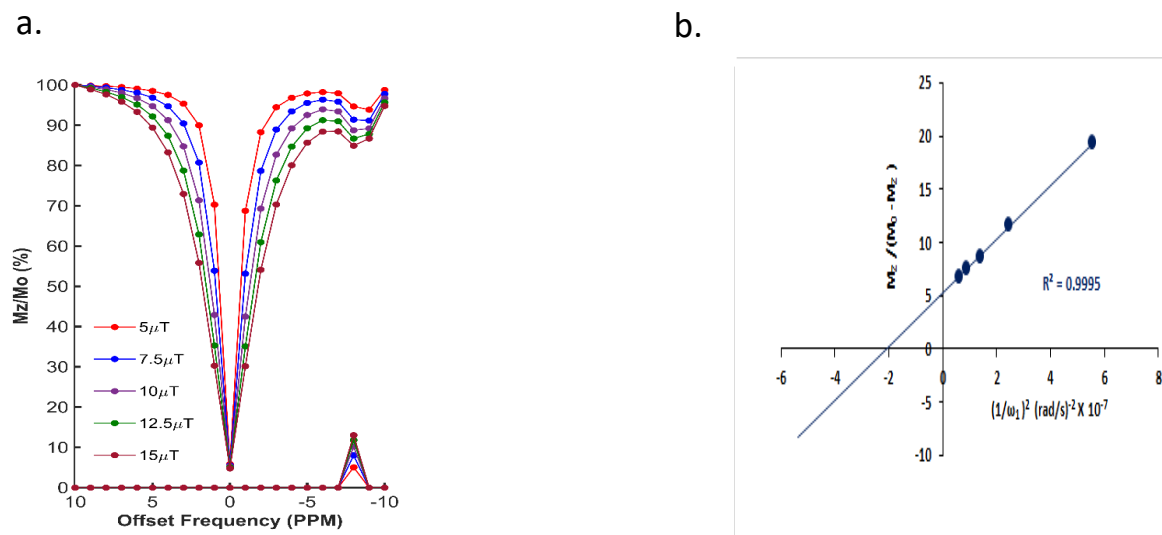

**Figure S6:** (a) Dependence of CEST percentage on saturation field strength ranging from 5 $\mu$ T to 15 $\mu$ T for pH 7.0 (b) Omega plot for exchange rate measurement. The expected linear relationship of  $M_z/(M_0-M_z)$  as a function of  $1/\omega_1^2$  (rad/sec)<sup>-2</sup> x 10<sup>-7</sup> recorded at 9.4 T of 12.5 mM compound in 0.1M Tris-HCl buffer at pH 7.0. RF saturation pulse was applied for 6 s ensuring complete saturation.

a.

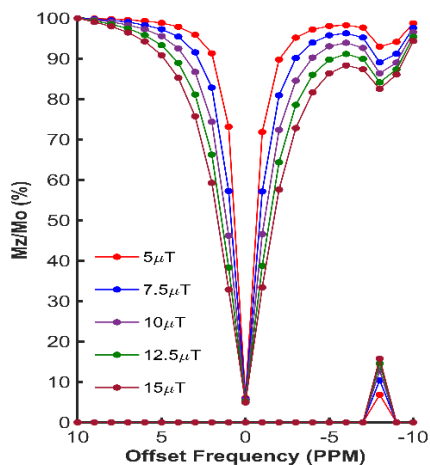

b.

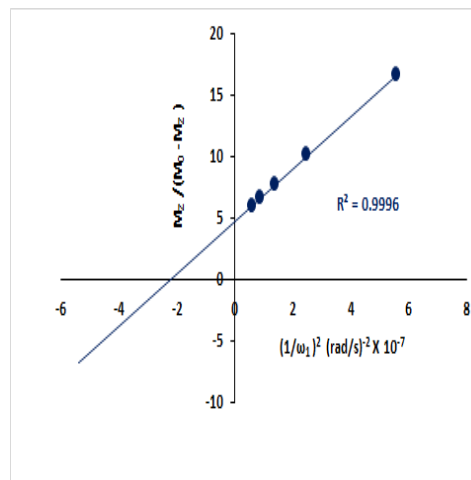

**Figure S7:** (a) Dependence of CEST percentage on saturation field strength ranging from  $5\mu\text{T}$  to  $15\mu\text{T}$  for pH 7.2 (b) Omega plot for exchange rate measurement. The expected linear relationship of  $M_z/(M_0-M_z)$  as a function of  $1/\omega_1^2$  (rad/sec) $^{-2} \times 10^{-7}$  recorded at 9.4 T of 12.5 mM compound in 0.1M Tris-HCl buffer at pH 7.2. RF saturation pulse was applied for 6 s ensuring complete saturation.

a.

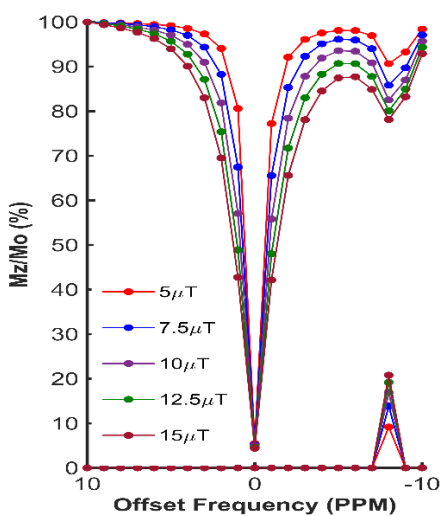

b.

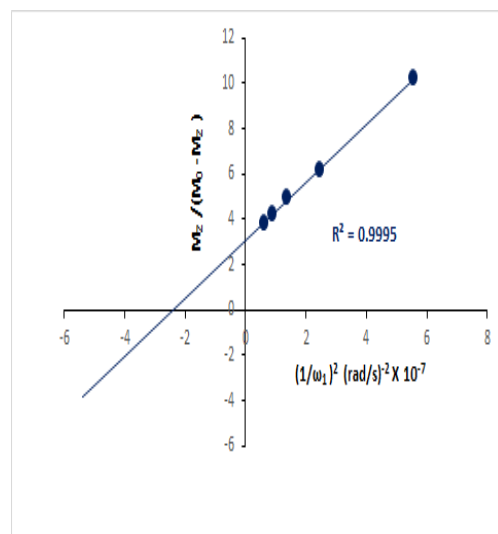

**Figure S8:** (a) Dependence of CEST percentage on saturation field strength ranging from  $5\mu\text{T}$  to  $15\mu\text{T}$  for pH 7.6 (b) Omega plot for exchange rate measurement. The expected linear relationship of  $M_z/(M_0-M_z)$  as a function of  $1/\omega_1^2$  (rad/sec) $^{-2} \times 10^{-7}$  recorded at 9.4 T of 12.5 mM compound in 0.1M Tris-HCl buffer at pH 7.6. RF saturation pulse was applied for 6 s ensuring complete saturation.

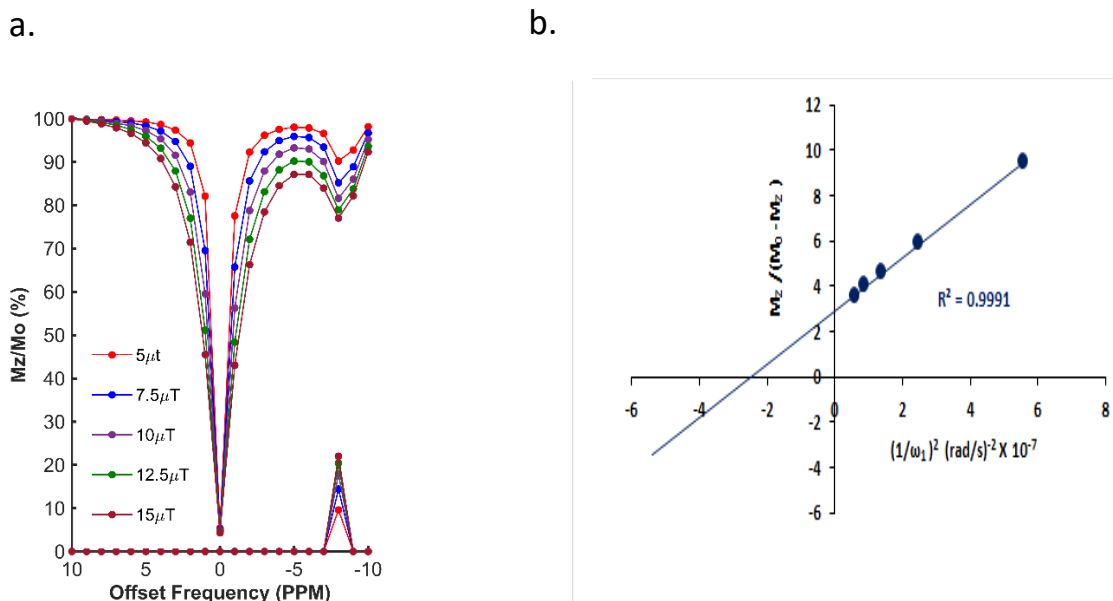

**Figure S9:** (a) Dependence of CEST percentage on saturation field strength ranging from  $5\mu\text{T}$  to  $15\mu\text{T}$  for pH 7.8 (b) Omega plot for exchange rate measurement. The expected linear relationship of  $M_z/(M_0 - M_z)$  as a function of  $1/\omega_1^2$  (rad/sec) $^{-2} \times 10^{-7}$  recorded at 9.4 T of 12.5 mM compound in 0.1M Tris-HCl buffer at pH 7.8. RF saturation pulse was applied for 6 s ensuring complete saturation.

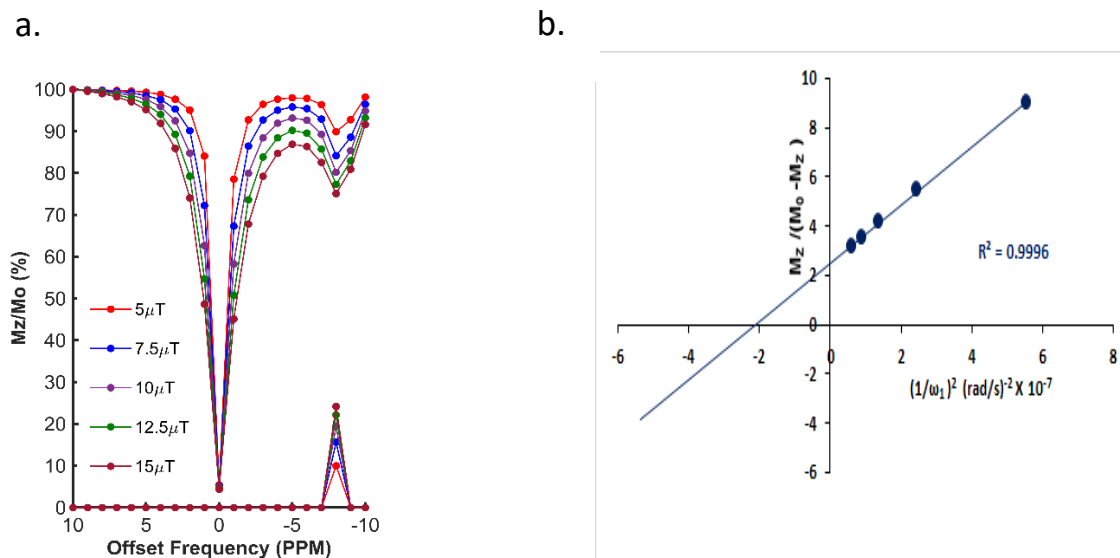

**Figure S10:** (a) Dependence of CEST percentage on saturation field strength ranging from  $5\mu\text{T}$  to  $15\mu\text{T}$  for pH 8.0 (b) Omega plot for exchange rate measurement. The expected linear relationship of  $M_z/(M_0 - M_z)$  as a function of  $1/\omega_1^2$  (rad/sec) $^{-2} \times 10^{-7}$  recorded at 9.4 T of 12.5 mM compound in 0.1M Tris-HCl buffer at pH 8.0. RF saturation pulse was applied for 6 s ensuring complete saturation.

a.

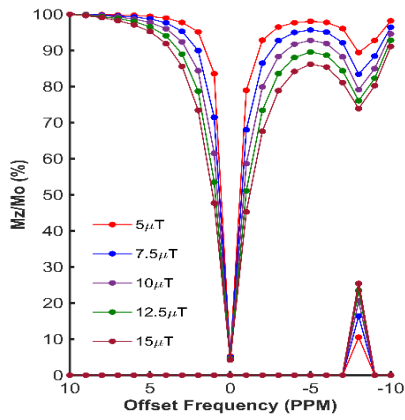

b.

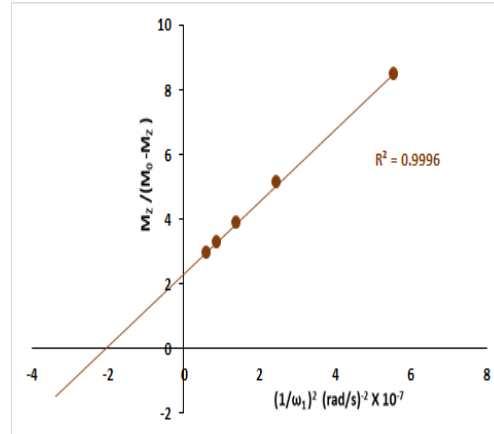

**Figure S11** : (a) Dependence of CEST percentage on saturation field strength ranging from  $5\mu\text{T}$  to  $15\mu\text{T}$  for pH 8.3 (b) Omega plot for exchange rate measurement for pH 8.3. The expected linear relationship of  $M_z/(M_0-M_z)$  as a function of  $1/\omega_1^2$  (rad/sec) $^{-2} \times 10^{-7}$  was obtained at 9.4 T of 12.5 mM compound in 0.1M Tris-HCl buffer. RF presaturation pulse was applied for 6 s ensuring complete saturation.

a.

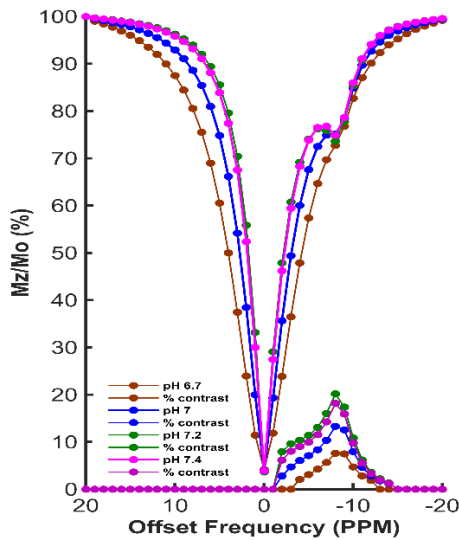

b.

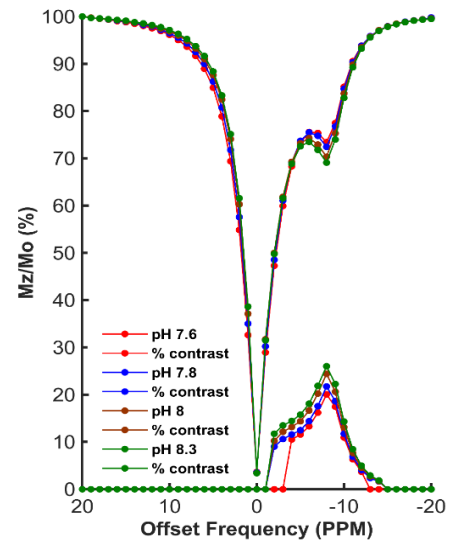

**Figure S12** : Dependence of CEST effect of TmPyP on pH. (a) Overlaid Z-spectra with pH ranging from 6.7 to 7.4. (b) Overlaid Z-spectra with pH ranging from 7.6 to 8.3. Radiofrequency saturation was applied for 3s with a saturation radiofrequency of  $5\mu\text{T}$ .

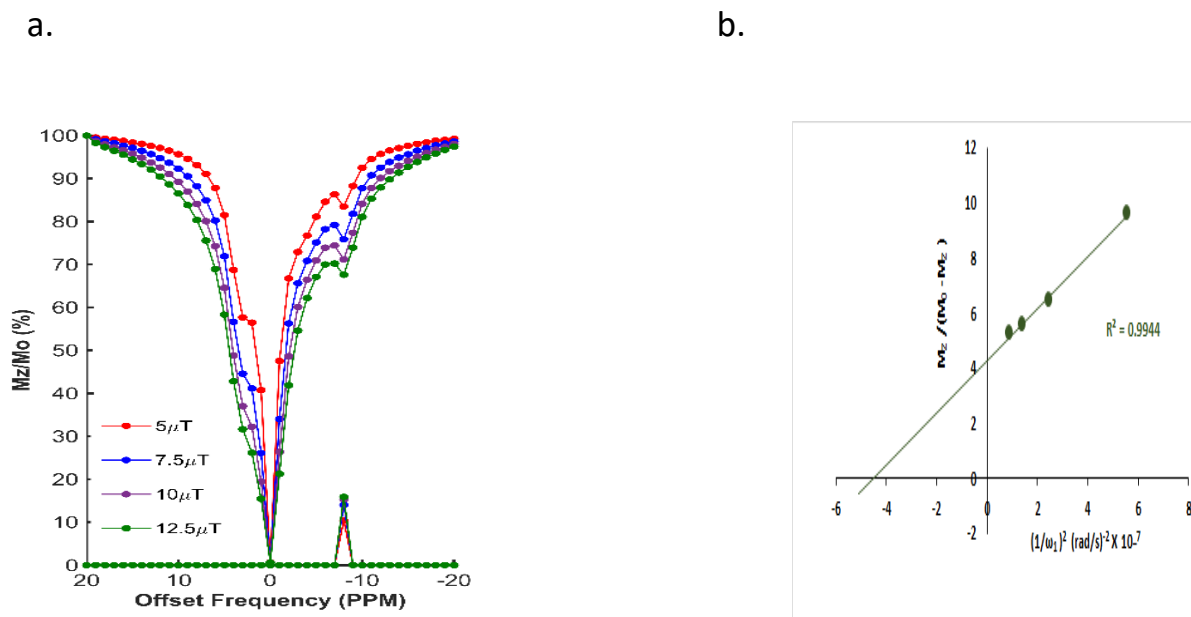

**Figure S13** : (a) Dependence of CEST percentage on saturation field strength ranging from 5 μT to 12.5 μT for FBS at 7.4 pH (b) Omega plot for exchange rate measurement. The expected linear relationship of  $M_z/(M_0 - M_z)$  as a function of  $1/\omega_1^2$  (rad/sec)<sup>-2</sup> x 10<sup>-7</sup> recorded at 9.4 T of 12.5 mM TmPyP in Foetal bovine serum at pH 7.4. RF saturation pulse was applied for 6 s ensuring complete saturation.

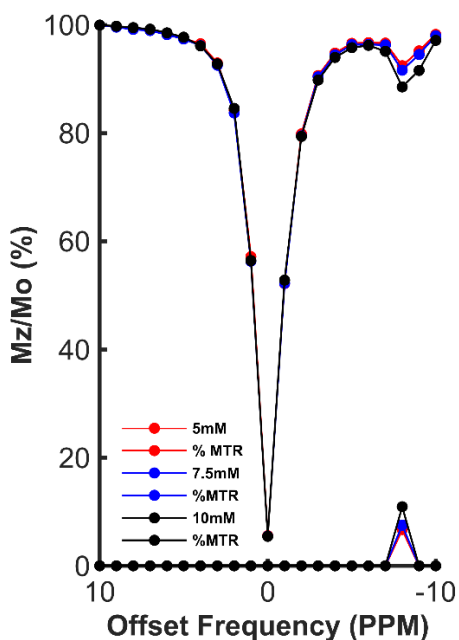

**Figure S14**: CEST contrast of TmPyP with varying concentration at pH 7.4 with a saturation field strength of 5 μT. At 5 mM concentration TmPyP produced 6% CEST percentage.
